# Supplementary material for: Id-neoantigen vaccine induces therapeutic CD8+ T cells against multiple myeloma: H chain-loss escapees cause FLC MM
Source: PubMed Central journal article supplement — J Immunother Cancer. 2023 Aug 22;11(8):e006944. doi: 10.1136/jitc-2023-006944 (PMC10445383; doi:10.1136/jitc-2023-006944), 2023-08-22
Supplement: jitc-2023-006944supp002.pdf [file jitc-2023-006944supp002.pdf]

## Id-neoantigen vaccine induces therapeutic CD8<sup>+</sup> T cells against multiple myeloma: H chain-loss escapees cause FLC MM

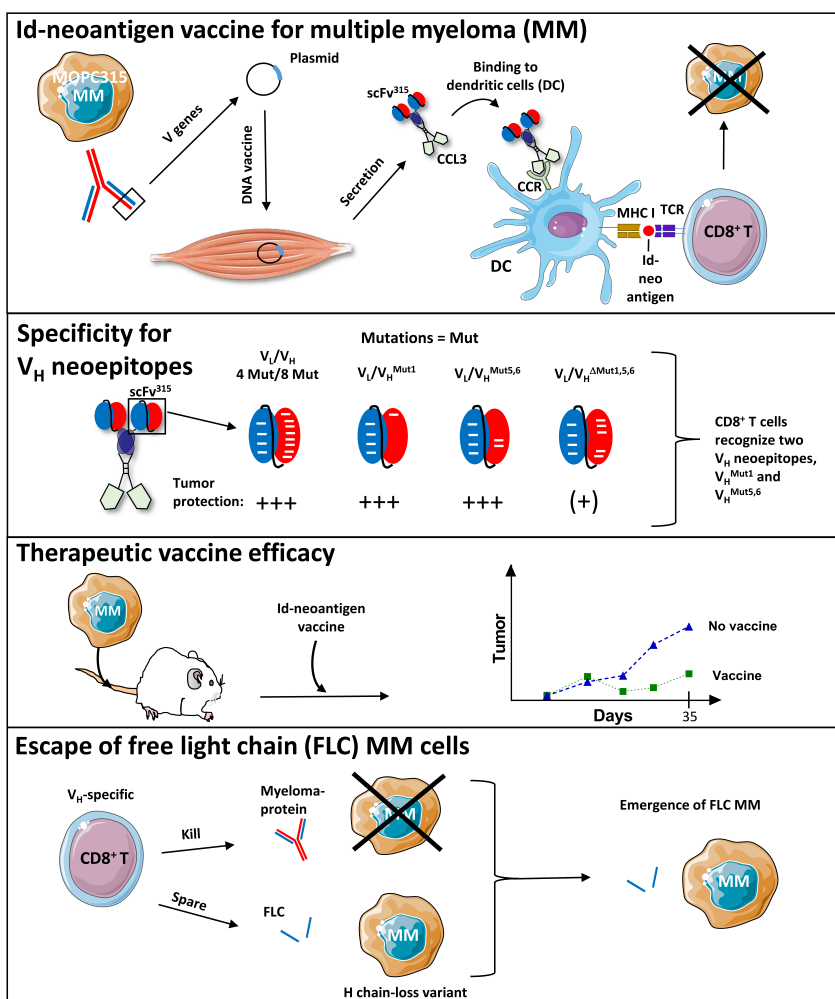

### Authors

Marita Westhrin, Jana Blazeovski, Ana Textor, Pegah Abdollahi, Ramakrishna P. Gopalakrishnan, Linda T. Ngo, Peter O. Hofgaard, Julia Heinzlbecker, Sonja Bobic, Even Fossum, Heidi C. L. Spång, Ranveig Braathen, Bjarne Bogen

### Correspondence

bjarne.bogen@medisin.uio.no and  
[Ranveig.Braathen@medisin.uio.no](mailto:Ranveig.Braathen@medisin.uio.no)

### In Brief

- A DC-targeted DNA vaccine induces V<sub>H</sub>-specific CD8<sup>+</sup> T cells with therapeutic efficacy against MOPC315 multiple myeloma
- CD8<sup>+</sup> T cells are specific for neoantigenic V<sub>H</sub>-sequences
- V<sub>H</sub>-specific CD8<sup>+</sup> T cells cause emergency of free light chain (FLC)-producing MM cells that have lost production of H chains
